# Supplementary material
Source: PubMed Central journal article supplement (PMC2984156)
Supplement: 1006608107_pnas.201006608SI.pdf [file 1006608107_pnas.201006608SI.pdf]

# Supporting Information

Wu et al. 10.1073/pnas.1006608107

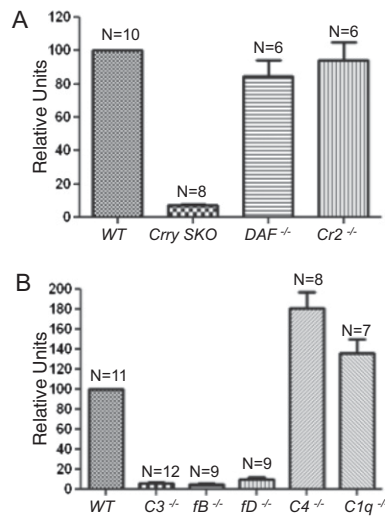

**Fig. S1.** Properdin concentration in WT and complement-deficient mice. After immunoprecipitation following by Western blotting, gels were scanned by densitometry. Properdin was normalized to WT controls. Western blots of mouse Ig heavy chain were used as a loading control for the C3, fB, and C4 blots. Number of mice in each group analyzed is noted. Mean ± SEM. *A* shows complement regulator/receptor deficient mice; *B* shows complement component deficient mice.

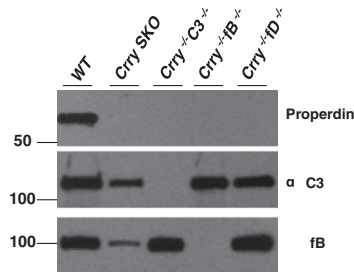

**Fig. S2.** Properdin concentration in *Crry*<sup>-/-</sup>*C3*<sup>-/-</sup>, *Crry*<sup>-/-</sup>*fB*<sup>-/-</sup>, and *Crry*<sup>-/-</sup>*fD*<sup>-/-</sup> mice. Representative of four *Crry*<sup>-/-</sup>*C3*<sup>-/-</sup>, four *Crry*<sup>-/-</sup>*fB*<sup>-/-</sup>, and two *Crry*<sup>-/-</sup>*fD*<sup>-/-</sup> mice.

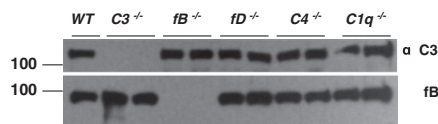

**Fig. S3.** C3 and fB are absent in their respective knockout mice by Western blot analysis. Representative of >10 *C3*<sup>-/-</sup> and 10 *fB*<sup>-/-</sup> mice.

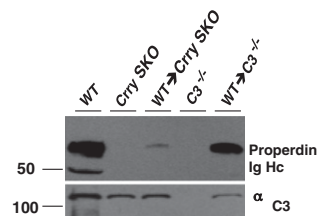

**Fig. S4.** Properdin reconstitution following serum infusion. WT serum (250 μL) was transferred to *Crry* SKO or *C3*<sup>-/-</sup> mice. After 2 h, samples were harvested from the recipient mice. Representative of three experiments. Densitometric scanning of the results at multiple time points from a similar experiment to that shown here are presented in Fig. 4B. The IgHc represents variable elution of the primary Ab used to pull down properdin (also Fig. S9).





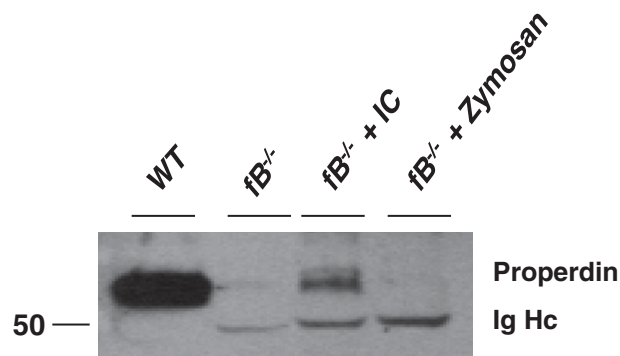

Fig. S9. Effect of immune complexes and zymosan on properdin release in *fB*<sup>-/-</sup> mice. Samples to measure properdin were obtained at 3 h.

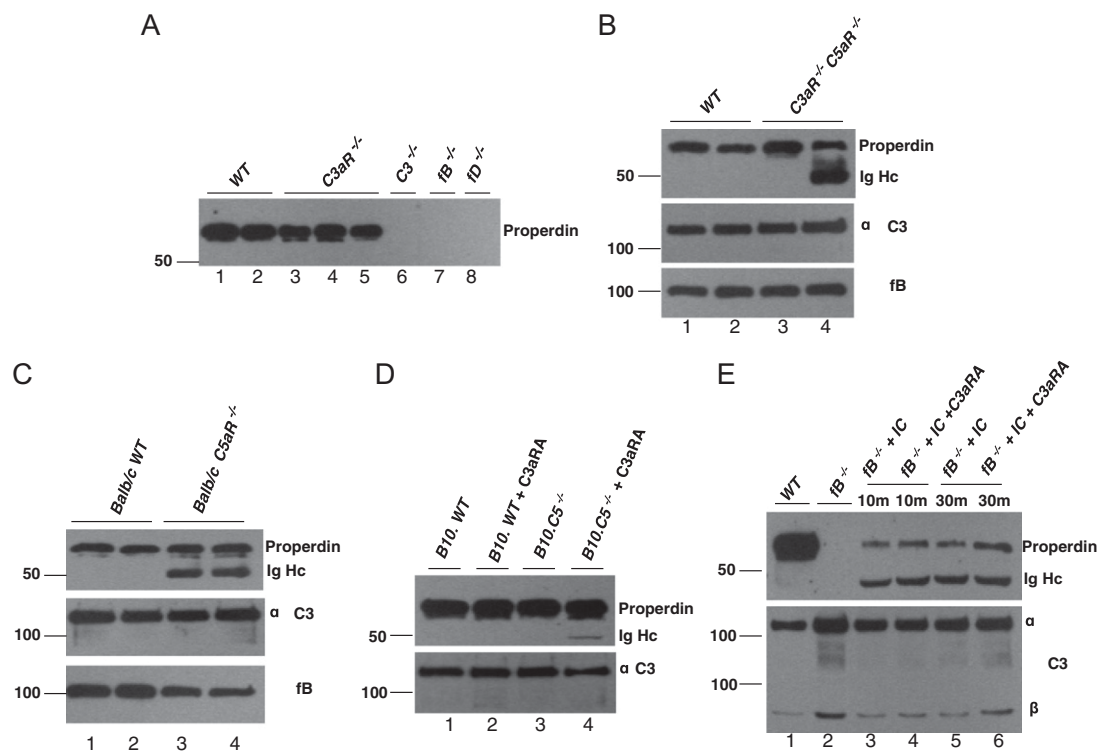

Fig. S10. Lack of a role for C3aR and/or C5aR in properdin release. (A) Properdin concentration in *C3aR*<sup>-/-</sup> mice. (B) Properdin concentration in *C3aR*<sup>-/-</sup> *C5aR*<sup>-/-</sup> mice. (C) Properdin concentration in *C5aR*<sup>-/-</sup> mice. (D) Properdin concentration in *B10.WT* control and *C5*<sup>-/-</sup> mice treated daily for 3 d with a C3aR antagonist (500 μg/mouse, SB 290157; Calbiochem). (E) Effect of C3aR antagonist on immune complex-induced properdin release in *fB*<sup>-/-</sup> mice. *fB*<sup>-/-</sup> mice were treated with C3aR antagonist at a dose of 500 μg/mouse. After 30 min, ICs were infused intravenously. Serum samples were then collected at 10 or 30 min. Each lane represents a different mouse.
